# Supplementary material for: Growth and Toxin Production of Gambierdiscus spp. Can Be Regulated by Quorum-Sensing Bacteria
Source: PubMed Central journal article supplement (PMC6071102; doi:10.3390/toxins10070257), 2018-06-22
Supplement: toxins-10-00257-s001.pdf [file toxins-10-00257-s001.pdf]

# Supplementary Materials: Growth and Toxin Production of *Gambierdiscus* spp. Can be Regulated by Quorum-Sensing Bacteria

Bo Wang, Mimi Yao, Jin Zhou, Shangjin Tan, Hui Jin, Feng Zhang, Yim Ling Mak, Jiajun Wu, Leo Lai Chan and Zhonghua Cai

## 1. Experimental section

Calculation of algal growth rate

During the co-culture experiment, the growth rate (divisions day<sup>-1</sup>) was calculated using data ( $n = 5$ ) of algal concentration from the exponential portion of the growth curve by least squares regression [1] as follows:

$$\text{Growth rate} = \frac{n \times \sum^n(t_i \times \ln C_i) - [\sum^n(t_i) \times \sum^n(\ln C_i)]}{\ln 2 \times \{n \times \sum^n(t_i^2) - [\sum^n(t_i)]^2\}}$$

where  $t_i$  = co-culture day,  $C_i$  = algal concentration and  $n$  = sample number. The average growth rate was calculated in triplicates.

## 2. Figures and Tables

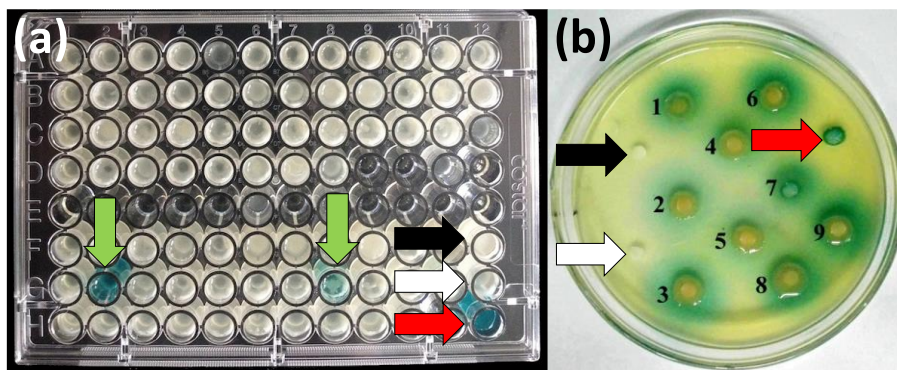

**Figure S1.** (a) The fast liquid AHL producers screening method in a 96-well microtiter plate and (b) the traditional solid agar plate screening results, with indicator strain A136. Black arrow: negative control (*E. coli* DH 5 $\alpha$ ); white arrow: blank control (water); red arrow: positive control (*P. aeruginosa* PAO1); green arrow: potential AHL-producing bacteria; 1 to 9: the screened AHL-producing strains.

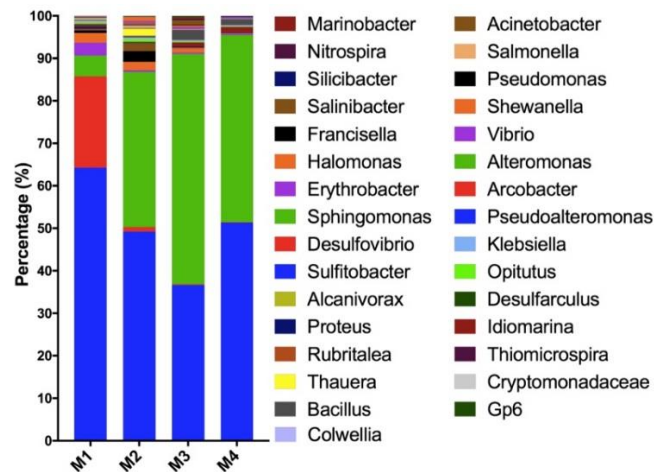

**Figure S2.** Taxonomic distribution at the genus level of the four sampling sites.

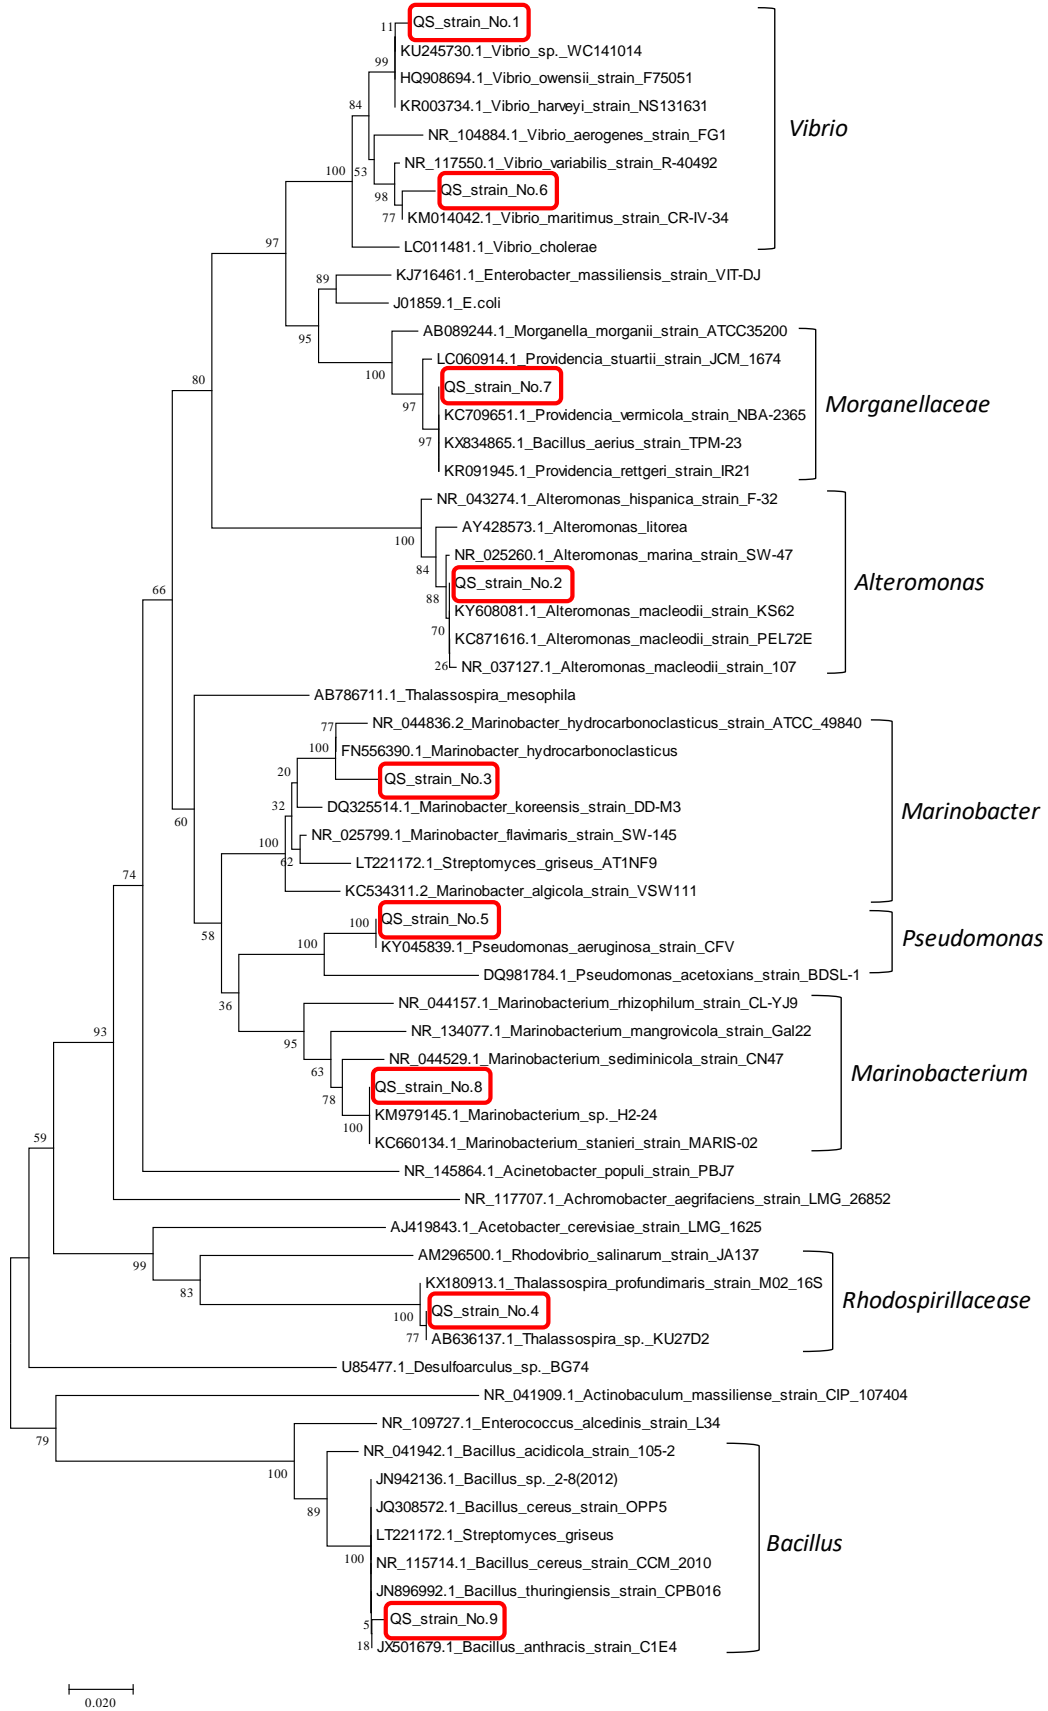

**Figure S3.** Phylogenetic tree generated using the 16s rRNA gene of the screened AHL-producing bacterial species/phylotypes. Statistical method: Neighbor-joining. Number of bootstrap replications: 500. Model: Maximum Composite Likelihood.

**Table S1.** Distribution of the corresponding genus of the screened QS bacteria.

| Strains                         | Genus                  | Distribution of the genus (%) |       |      |      |
|---------------------------------|------------------------|-------------------------------|-------|------|------|
|                                 |                        | M1                            | M2    | M3   | M4   |
| <i>Vibrio</i> sp.               | <i>Vibrio</i>          | 3.02                          | 0.36  | 0.34 | 0.32 |
| <i>A. macleodii</i>             | <i>Alteromonas</i>     | 4.89                          | 36.52 | 54.2 | 44.1 |
| <i>M. hydrocarbonoclasticus</i> | <i>Marinobacter</i>    | 0                             | 0     | 0.25 | 0.09 |
| <i>Thalassospira</i> sp.        | <i>Thalassospira</i>   | *                             | -     | -    | -    |
| <i>P. aeruginosa</i>            | <i>Pseudomonas</i>     | 0.54                          | 2.55  | 0.03 | 0.11 |
| <i>V. maritimus</i>             | <i>Vibrio</i>          | 3.02                          | 0.36  | 0.34 | 0.32 |
| <i>P. vermicola</i>             | <i>Providencia</i>     | -                             | -     | -    | -    |
| <i>M. stanieri</i>              | <i>Marinobacterium</i> | 0                             | 0     | 0.25 | 0.09 |
| <i>B. anthracis</i>             | <i>Bacillus</i>        | 0.2                           | 0.44  | 2.36 | 1.31 |

\* Could not be detected at genus level.

**Table S2.** *Gambierdiscus* strains from Marakei, Republic of Kiribati.

| Sample    | Species name                    | Toxicity (pg P-CTX-1 eq cell <sup>-1</sup> ) |
|-----------|---------------------------------|----------------------------------------------|
| 1022M2C12 | <i>Gambierdiscus</i> sp. type 5 | 0.004                                        |
| 1112M1M03 | <i>Gambierdiscus</i> sp. type 6 | 0.02                                         |
| 1021M1DC4 | <i>Gambierdiscus</i> sp. type 6 | 0                                            |

**Table S3.** The gene fragment for the phylogenetic analyses.

| >QS strain No.1                                                                                                                                                                                                                                                                                                                                                                                                                                                                                                                                                                                                                                                                                                                                                                                                                                                                                                                                                                                                                                                                                                                                                                                                                                                                                                                                                                                                                                                                                                                                                              |
|------------------------------------------------------------------------------------------------------------------------------------------------------------------------------------------------------------------------------------------------------------------------------------------------------------------------------------------------------------------------------------------------------------------------------------------------------------------------------------------------------------------------------------------------------------------------------------------------------------------------------------------------------------------------------------------------------------------------------------------------------------------------------------------------------------------------------------------------------------------------------------------------------------------------------------------------------------------------------------------------------------------------------------------------------------------------------------------------------------------------------------------------------------------------------------------------------------------------------------------------------------------------------------------------------------------------------------------------------------------------------------------------------------------------------------------------------------------------------------------------------------------------------------------------------------------------------|
| ATGGCGGCAGCTACCATGCAGTCGAGCGGAACGAGTTATCTGAACCTTCGGGGGACGATAACGGC<br>GTCGAGCGGGCGGACGGGTGAGTAATGCCTAGGAAATTGCCCTGATGTGGGGGATAACCATTGGAA<br>ACGATGGTAATACCGCATAATGCCTACGGGCCAAAGAGGGGGACCTTCGGGCCTCTCGCGTCAGG<br>ATATGCCTAGGTGGGATTAGCTAGTTGGTGAGGTAATGGCTCACCAATGCGACGATCCCAAGCTGG<br>TCTGAGAGGATGATCAGCCACACTGGAAGTGAAGACACGGTCCAGACTCCTACGGGAGGCAGCAGT<br>GGGGAATATTGCACAATGGGCGCAAGCCTGATGCAGCCATGCCGCGTGTGTGAAGAAGGCCTTCG<br>GGTTGTAAAGCACTTTCAGTCGTGAGGAAGGTGGTGTAGTTAATAGCTGTATTATTTGACGTTAGCG<br>ACAGAAGAAGCACCGGCTAACTCCGTGCCAGCAGCCGCGTAATACGGAGGGTGGCAGCGTTGAT<br>CGGAATTACTGGGCGTAAAGCGCATGCAGGTGGTTTGTAAAGTCAGATGTGAAAGCCCGGGGCTCA<br>ACCTCGGAATAGCATTGAAACTGGCAGACTAGAGTACTGTAGAGGGGGGTAGAATTTAGGTGTA<br>GCGGTGAAATGCGTAGAGATCTGAAGGAATACCGGTGGCGAAGGCGGCCCCCTGGACAGATACTG<br>ACACTCAGATGCGAAAGCGTGGGAGCAAACAGGATTAGATACCCTGGTAGTCCACGCCGTAAC<br>GATGTCTACTCGGAGGTTGTGGCCTTGGGCGTGGCTTTCGGAGCTAACGCGTTAAGTAGACCGCCT<br>GGGAGTACGGTGCAGATTAATAAATCAATGAATTGACGGGGCCCGCACAAAGCGGTGGAGCA<br>TGTGGTTTAATTCGATGCAACGCGAAGAACCTTACTACTCTTGACATCCAGAGAACTTTCCAGAGA<br>TGGATTGGTGCCTTCGGAACTCTGAGAGAGGTGCTGCATGGCTGTCGTCAGCTCGTGTGTGAAAT<br>GTTGGGTTAAGTCCCGCAACGAGCGCAACCCTTATCCTTGTCTGCCAGCGAGTAATGTCGGGAACTC<br>CAGGGAGACTGCCGGTGATAAACCGGAGGAAGTGGGGACGACGTCAAGTCATCATGGCCCTTAC<br>GAGTAGGGCTACACACGTGCTACAATGGCGCATAACAGAGGGCAGCAAGCTAGCGATAGTGAGCGA<br>ATCCCAAAAAGTGCCTCGTAGTCCGGATTGGAGTCTGCAACTCGACTCCATGAAGTCGGAATCGCT<br>AGTAATCGTGGATCAGAATGCCACGGTGAATACGTTCCCGGCCTTGTACACACCGCCCGTACAC<br>CATGGGAGTGGGCTGCAAAGAAGTAGGTAGTTAACCTTCGGGAGGACGCTACCACTTAGTCTCG |
| >QS strain No.2                                                                                                                                                                                                                                                                                                                                                                                                                                                                                                                                                                                                                                                                                                                                                                                                                                                                                                                                                                                                                                                                                                                                                                                                                                                                                                                                                                                                                                                                                                                                                              |
| ACATGCAAGTCGTACCAATAACATCATACTAGCTTGCTAGAAGATGACGAGTGCGGACGGGTGA<br>GTAATGCTTGGGAACTTGCCTTTGCGAGGGGGATAACAGTTGGAAACGACTGCTAATACCGCATAA<br>TGTCTTCGGACCAAACGGGGCTTCGGCTCCGGCGCAAAGAGAGGCCAAGTGAGATTAGCTAGTTG<br>GTAAGGTAACGGCTTACCAAGGCGACGATCTCTAGCTGTTCTGAGAGGAAGATCAGCCACACTGGG<br>ACTGAGACACGGCCAGACTCCTACGGGAGGCAGCAGTGGGGAATATTGCACAATGGGGGAAACC<br>CTGATGCAGCCATGCCGCGTGTGTGAAGAAGGCCTTCGGGTTGTAAGCACTTTCAGTTGTGAGGA<br>AAAGTTAGTAGTTAATACCTGCTAGCCGTGACGTTAACAACAGAAGAAGCACCGGCTAACTCCGTG<br>CCAGCAGCCGCGTAATACGGAGGGTGGCAGCGTTAATCGGAATTAAGGGCGTAAAGCGCACCG<br>AGGCGGTTTGTAAAGCTAGATGTGAAAGCCCCGGGCTCAACCTGGGATGGTCATTTAGAAGTGGCA                                                                                                                                                                                                                                                                                                                                                                                                                                                                                                                                                                                                                                                                                                                                                                                                                                                                                                                                    |

GACTAGAGTCTTGGAGAGGGGAGTGGAAATCCAGGTGTAGCGGTGAAATGCGTAGATATCTGGAG  
 GAACATCAGTGGCGAAGGGCGACTCCCTGGCCAAAGACTGACGCTCATGTGCGAAAAGTGTGGGTAG  
 CGAACAGGATTAGATACCCTGGTAGTCCACACCGTAAACGCTGTCTACTAGCTGTGTGTCTTTAA  
 GACGTGCGTAGCGAAGCTAACGCGCTAAGTAGACCGCCTGGGGAGTACGGCCGCAAGGTTAAAC  
 TCAAATGAATTGACGGGGGCCCGCACAAAGCGGTGGAGCATGTGGTTTAAATTCGATGCAACGCGAA  
 GAACCTTACCTACACTTGACATGCTGAGAAGTTACTAGAGATAGTTTCGTGCCTTCGGAACTCAGA  
 CACAGGTGCTGCATGGCTGTCGTGAGCTCGTGTGAGATGTTGGGTTAAGTCCCGCAACGAGCG  
 CAACCTTGTCCCTAGTTGCCAGCCTTAAGTTGGGCACTCTAAGGAGACTGCCGGTGACAAACCGG  
 AGGAAGGTGGGGACGACGTCAAGTCATCATGGCCCTTACGTGTAGGGCTACACACGTGCTACAATG  
 GCATTTACAGAGGGGAAGCGAGACAGTGTGTGGAGCGGACCCCTTAAAGAATGTCGTAGTCCGGA  
 TTGGAGTCTGCAACTCGACTCCATGAAGTCGGAATCGCTAGTAATCGCAGGTCAGAATACTGCGGT  
 GAATACGTTCCCGGCCCTTGTACACACCGCCCGTACACCATGGGAGTGGGATGCAAAAGAAGTA  
 GTTAGTCTAACCTTCGGGAGGACGATTACCACTT

---

**>QS strain No.3**

AAGCTTGCTTCCCGCTGACGAGCGGCGGACGGGTGAGTAATGCTTAGGAATCTGCCAGTAGTGGG  
 GGATAGCCCGGGGAAACCCGGATTAATACCGCATACGTCCTACGGGAGAAAGCAGGGGATCTTCG  
 GACCTTGCCTATTGGATGAGCCTAAGTCGGATTAGCTAGTTGGTGGGGTAAAGTCTACCAAGGC  
 GACGATCCGTAGCTGGTCTGAGAGGATGATCAGCCACATCGGGACTGAGACACGGCCCGAACTCCT  
 ACGGGAGGCAGCAGTGGGGAATATTGGACAATGGGGGCGACGCTGATCCAGCCATGCCCGGTGTG  
 TGAAGAAGGCTTTCGGGTTGTAAAGCACTTTCAGTAGGGAGGAAAACCTTATGGTTAATACCCATG  
 AGGCTTGACGTTACCTACAGAAGAAGCACCGGCTAACTCCGTGCCAGCAGCCGCGGTAGTACGGA  
 GGGTGTAGCGTTAATCGGAATTACTGGGCGTAAAGCGCGCGTAGGTGGTTTGGTGAGCGAGATGT  
 GAAAGCCCCGGCTTAACTGGGAACGGCATTTCGAACTGTCAGACTAGAGTGTGGTAGAGGGTA  
 GTGGAATTTCTGTGTAGCGGTGAAATGCGTAGATATAGGAAGGAACACCAGTGGCGAAGGCGGC  
 TAGCCTGGACCAACCACTGATCACTGAGGTGCGAAAGCGTGGGGAGCAAACAGGATTAGATACCC  
 TGGTATTCCACGCCGTAACGATGTCAACTAGCCGTTGGGACTCTTGAAGTCTTAGTGGCGCAGCTA  
 ACGCACTAAGTTGACCGCTGGGGAGTACGGCCGCAAGGTTAAACTCAAATGAATTGACGGGGG  
 CCCGCACAAGCGGTGGAGCATGTGGTTTAAATTCGACGCAACGCGAAGAACCTTACCTGGCCTTGAC  
 ATCCAGAGAACTTTGCAGAGATGGGTTGGTGCCTTCGGGAACTCTGAGACAGGTGCTGCATGGCTG  
 TCGTCAGCTCGTGTGAGATGTTGGGTTAAGTCCCGTAACGAGCGCAACCCCTATCCCTGGTTGC  
 TAGCAGGTAATGCTGAGAACTCCAGGGAGACTGCCGTGACAAACCGGAGGAAGGTGGGGATGAC  
 GTCAGGTCATCATGGCCCTTACGGCCAGGGCTACACACGTGCTACAATGGCGGTACAGAGGGCTG  
 CCAACTCGCGAGAGTGAGCCAATCCCTTAAACGCGTCGTAGTCCGGATCGGAGTCTGCAACTCGA  
 CTCCTGAAAGTCGGAATCGCTAGTAATCGCGAATCAGAATGTCGCGGTGAATACGTTCCCGGCCCT  
 TGTACACACCGCCCGTACACCATGGGAGTGGATTGAACCAGAAGTA

---

**>QS strain No.4**

GTTTGAAGGATGATCAGCCACACTGGGACTGAGACACGGCCAGACTCCTACGGGAGGCAGCAG  
 TGGGGAATATTGGACAATGGGGGCAACCCTGATCCAGCCATGCCCGGTGAGTGAAGAAGGCCTTC  
 GGGTTGTAAGCTCTTTCAGATGCGAAGATGATGACGGTAAACATCAGAAGAAGCCCCGGCTAATTT  
 CGTGCCAGCAGCCGCGTAATACGAAAGGGGCTAGCGTTGTTTCGGATTTACTGGGCGTAAAGGGCA  
 CGCAGGCGGTCTTGCCAGTCAGGGGTGAAAGCCCGGGGCTCAACCCCGGAACTGCCTCTGATACTG  
 CAAGACTAGAGACTAGGAGAGGGTGGTGAATTCAGTGTAGAGGTGAAATTCGTAGATATTGG  
 GAGGAACACCAGAGGCGAAGGCGGCCACCTGGACTAGATCTGACGCTCAGGTGCGAAAGCGTGGG  
 GAGCAAACAGGATTAGATACCCTGGTAGTCCACGCCGTAACGATGAGTGTAGTTGTTCGGGACTT  
 CGATTTCCGGTACGCAGCTAACGCATTAAGCACTCCGCTGGGGAGTACGGTTCGCAAGATTAAC  
 TCAAAGGAATTGACGGGGGCCCGCACAAAGCGGTGGAGCATGTGGTTTAAATTCGAAGCAACGCGCA  
 GAACCTTACCAACCCTTACATCCCTATCGCGATTTCCAGAGATGGATATCATCAGTTCGGCTGGAT  
 AGGTGACAGGTGCTGCATGGCTGTCGTGAGCTCGTGTGAGATGTTGGGTTAAGTCCCGCACGA  
 GCGCAACCCCTGTTCTAGTGCCAGCATTTAGTTGGGCACTCTAGGAGACTGCCGTGACAAGCCGG  
 AGGAAGCCGGGGATGACGTCAAGTCCTCATGGCC

---

**>QS strain No.5**

TGGGAGGAAGGGCAGTAAGTTAATACCTTGTGTTTTGACGTTACCAACAGAATAAGCACCGGCTA  
 ACTTCGTGCCAGCAGCCGCGTAATACGAAGGGTGCAAGCGTTAATCGGAATTACTGGGCGTAAAG  
 CGCGGTAGGTGGTTCAGCAAGTTGGATGTGAAATCCCCGGGCTCAACCTGGGAACTGCATCCAAA  
 ACTACTGAGCTAGAGTACGGTAGAGGGTGGTGAATTTCTGTGTAGCGGTGAAATGCGTAGATAT  
 AGGAAGGAACACCAGTGGCGAAGGCGACCACCTGGACTGATACTGACTGAGGTGCGAAAGCGT  
 GGGGAGCAAACAGGATTAGATACCCTGGTAGTCCACGCCGTAACGATGTCGACTAGCCGTTGGG  
 ATCCTTGAAGTCTTAGTGGCGCAGCTAACGCGATAAGTCGACCGCCTGGGGAGTACGGCCGCAAGG

---

TTAAAACTCAAATGAATTGACGGGGGCCCGCACAAAGCGGTGGAGCATGTGGTTTAATTGGAAGCAA  
CGCGAAGAACCTTACCTGGCCTTGACATGCTGAGAACTTTCCAGAGATGGATTGGTGCCTTCGGGA

**>QS strain No.6**

GTGAGTAATGCCTGGGAAATTGCCCTGATGTGGGGGATAACCATTGAAACGATGGCTAATACCGC  
ATAATAGCTTCGGCTCAAAGAGGGGGACCTTCGGGCCTCTCGCGTCAGGATATGCCAGGTGGGAT  
TAGCTAGTTGGTGAGGTAATGGCTACCAAGGCGACGATCCCTAGCTGGTCTGAGAGGATGATCAG  
CCACACTGGAAGTGAACACGGTCCAGACTCCTACGGGCGGCACCAGTGGCGAATATTGCACAAT  
GGGCGCAAGCCTGATGCAGCCATGCCGCGTGTATGAATAAGGCCTTCGGGTTGTAAAGTACTTTCA  
GCAGTGAGGAAGGTGGTGTCTTAATAGCGGCATCATTTGATGTTAGCTGCAGAAGAAGCACCGGC  
TAACTCCGTGCCAGCAGCCGCGTAATACGGAGGGTGCAGCGTGGATCGGAATTACTGGGCGCA  
AAGCGCATGCAGGTGGTTAGTTAAGTCAGATGTGAAAGCCCGGGCTCAACCTCGGAAGTGCATTT  
GAAACTGGCTGACTAGAGTACTGTAGAGGGGGTGAATTTAGGTGTAGCGGTTAATGCGTAGA  
GATCTGAAGGAATACCGGTGGCGAAGGCGCCCCCTGGACAGATACTGACTCAGATGCGAAAG  
CGTGGGAGCACACAGGATTAGATACCCTGGTAGTCCACGCCGTAACCGATGTCTACTTGGAGGTT  
GTGGCCTTGAGCCGTGGCTTTTCGGAGCTAACGCGTTAAGTAGACCGCCTGGGGAGTACGGTCGCAA  
GATTAAAACTCAAATGAATTGACGGGGGCCCGCACAAAGCGGTGGAGCATGTGGTTTAATTGATGC  
AACCGAAGAACCTTACCTACTCTTGACATCCAGAGAACTTAGCAGAGATGCTTTGGTGCCTTCGG  
GAACTCTGAGACAGGTGCTGCATGGCTGTCGCAGCTCGTGTGTTGTGAAATGTTGGGTTAAGTCCCG  
AACGAGCGCAACCCTTATCCTGTTTCCAGCACTTCGGGTGGGAACTCCAGGGAGACTGCCGGTG  
ATAAACCGGAGGAAGGTGGGACGACGTCAAGTCATCATGGCCCTTACGAGTAGGGCTACACACG  
TGCTACAATGGCGCATAACAGAGGGCRGCAACTTGCGAAAGTGAGCGAATCCCAAAAAGTGGCTC  
GTAGTCCGGATTGGAGTCTGCAACTCGACTCCATGAAGTCGGAATCGCTAGTAATCGTGGATCAGA  
ATGCCACGGTGAATACGTTCCCGGGCCTTGACACACCGCCGTCACACCATGGGAGTGGGCTGCA  
AAAGAAGTGGGTAGTTAACCTTCGGGAGGACGCTCACCACTTTGTGGTTCATGACTGGGGTGAAG  
TCGTAACAAGGTA

**>QS strain No.7**

AGGCCCTAGGGTTGTAAAGTACTTTAGTCGGGAGGAAGGCGTTGTTGCTAATATCAACAACGATT  
GACGTTACCGACAGAAGAAGCACCGGCTAACTCCGTGCCAGCAGCCGCGTAATACGGAGGGTGC  
AAGCGTTAATCGGAATTACTGGGCGTAAAGCGCACGCAGGCGGTTGATTAAGTTAGATGTGAAATC  
CCCGGGCTTAACTGGGAATGGCATCTAAGACTGGTCAGCTAGAGTCTTGTAGAGGGGGGTAGAAT  
TCCATGTGTAGCGGTGAAATGCGTAGAGATGTGGAGGAATACCGGTGGCGAAGGCGCCCCCTGG  
ACAAAGACTGACGCTCAGGTGCGAAAGCGTGGGGAGCAAAACAGGATTAGATACCCTGGTAGTCCA  
CGCTGTAAACGATGTCGATTTGAAGGTTGTTCCCTTGAGGAGTGGCTTTTCGGAGCTAACGCGTTAAA  
TCGACCCCTGGGGAGTACGGCCGCAAGGTTAAACTCAAATGAATTGACGGGGGCCCGCACAAAGC  
GGTGGAGCATGTGGTTTAATTCGATGCAACCGAAGAACCTTACCTACTCTTGACATCCAGAGAAC  
TTAGCAGAGATGCTTTAGTGCCTTCGG

**>QS strain No.8**

CGTGGCGGACGCTACACATGCAGTCGAGCGGTAACAGAAGTACTGCTAGTTGCTGACGAGCGG  
CGGACGGGTGAGTAACGCGTGGGAATCTGCCTGGTAGTGGGGACAACAGTTGGAAACGACTGCT  
AATACCGCATAACGCCCTTCGGGGAAAGTAGGGGATCTTCGGACCTTACGCTATCAGATGAGCCCG  
CGTCGGATTAGCTTGTGGTGAGGTAAGGCTCACCAAGGCGATGATCCGTAGCTGGTCTGAGAGG  
ATGATCAGCCACACTGGGACTGAGACACGGCCCAGACTCCTACGGGAGGCAGCAGTGGGGAATAT  
TGGACAATGGGGGCAACCCTGATCCAGCCATGCCGCGTGTGTGAAGAAGGCCTTCGGGTTGTAAAG  
CACTTTAGATGTGAGGAAAGGTGTGTGGTTAATACCCGCATACTGTGACGTTAACATCAGAAGAA  
GCACCGGTAACCTCCGTGCCAGCAGCCGCGTAATACGGAGGGTGAAGCGTTAATCGGAATTACT  
GGGCGTAAAGCGCACGTAGGTGGTTTGGTCAGTCAGATGTGAAAGCCCCGGGCTCAACCTGGGAA  
CTGCACCTGATACTGCCAGACTAGAGTACGGTAGAGGGTAGTGAATTTCCGGTGTAGCGGTGAAA  
TGCGTAGAGATCGGAAGGAACACCAGTGGCGAAGGCGACTGCCTGGACCGATACTGACTGAGG  
TGCGAAAGCGTGGTAGCAAACAGGATTAGATACCCTGGTAGTCCACGCCGTAACCGATGTCAACT  
AGCCGTTGGGGACTTGATCCTTTAGTGGCGCAGCTAACCGGATAAGTTGACCGCTGGGGAGTAC  
GGCCGCAAGGTTAAACTCAAATGAATTGACGGGGGCCCGCACAAAGCGGTGGAGCATGTGGTTTA  
ATTCGAAGCAACCGAAGAACCTTACCTACTCTTGACATCCTGCGAACTTGTAGAGATAGCTTGGT  
GCCTTCGGGAACGCAGTGACAGGTGCTGCATGGCTGTCGTCAGCTCGTGTGTTGTGAAATGTTGGGTTA  
AGTCCCGTAACGAGCGCAACCCCTATCCTTATTTGCCAGCACTTCGGGTGGGAACTCTAAGGAGAC  
TGCCGGTGACAAACCGGAGGAAGGTGGGGATGACGTCAAGTCATCATGGCCCTTACGAGTAGGGC  
TACACACGTGCTACAATGGCCGATACAGAGGGCCGCAACTCGCGAGGGTAAGCAAATCTCAGAA  
AACCGGTCGTAGTCCGGATCGCAGTCTGCAACTCGACTGCGTGAAGTCGGAATCGCTAGTAATCGC

GAATCAGAATGTCGCGGTGAATACGTTCCCGGGCCTTGACACACCGCCCGTCACACCATGGGAGT  
GGGTTGCACCAGAAGTAGCTAGTCTAACCTTCGGGAGGACGGTACCACGGGGTTACAA

>QS strain No.9

CATGGCCGCGTGCTATACATGCAAGTCGAGCGAATGGATTAAGAGCTTGCTCTTATGAAGTTAGCG  
GCGGACGGGTGAGTAACACGTGGGTAACCTGCCATAAGACTGGGATAACTCCGGGAAACCGGGG  
CTAATACCGGATAACATTTGAACCGCATGGTTTCGAAATTGAAAGGCGGCTTCGGCTGTCACCTTATG  
GATGGACCCGCGTCGATTAGCTAGTTGGTGAGGTAACGGCTCACCAAGGCAACGATGCGTAGCCG  
ACCTGAGAGGGTGATCGGCCACACTGGGACTGAGACACGGCCAGACTCCTACGGGAGGCAGCAG  
TAGGGAATCTCCGCAATGGACGAAAGTCTGACGGAGCAACGCCGCGTGAGTGATGAAGGCTTTCG  
GGTCGTAAAACCTCTGTTGTTAGGGAAGAACAAGTGCTAGTTGAATAAGCTGGCACCTTGACGGTAC  
CTAACCCAGAAAGCCACGGCTAACTACGTGCCAGCAGCCGCGGTAATACGTAGGTGGCAAGCGTTA  
TCCGGAATTATTGGGCGTAAAGCGCGCGCAGGTGGTTTCTTAAGTCTGATGTGAAAGCCCACGGCT  
CAACCGTGAGGGTCATTGGAAACTGGGAGACTTGAGTGCAGAAGAGGAAAGTGGAAATCCATGT  
GTAGCGGTGAAATGCGTAGAGATATGGAGGAACACCAGTGGCGAAGGCGACTTCTGGTCTGTAAC  
TGACACTGAGGCGCGAAAGCGTGGGGAGCAAACAGGATTAGATACCCTGGTAGTCCACGCCGTA  
ACGATGAGTGCTAAGTGTTAGAGGGTTTCCGCCCTTATGTGCTGAAGTTAACGCATTAAGCACTCCG  
CCTGGGGAGTACGGCCGCAAGGCTGAAACTCAAAGGAATTGACGGGGGCCCGCACAAGCGGTGGA  
GCATGTGGTTTATTCGAAGCAACGCGAGAACCCTACCAGGTCTCGACATCCTTCTGACAACCCTAG  
AGATAGGGCTTCTTCTTCGGGAGCAGAGTTGACAGGTGATGCATGTTGTCGTCACCTCGTGTCTGAGA  
TGTTGGGTAAGTTCCGCAACGACGCAACCCGTGATCTTAGTTGCCTTCATTAAAGTTGGG

Table S4. Growth rate (divisions day<sup>-1</sup>) of 1022M2C12 in co-culture experiment.

| Sample        | Low concentration<br>(5 × 10 <sup>3</sup> cells/mL) | Medium concentration<br>(5 × 10 <sup>4</sup> cells/mL) | High concentration<br>(5 × 10 <sup>5</sup> cells/mL) |
|---------------|-----------------------------------------------------|--------------------------------------------------------|------------------------------------------------------|
| Bacteria No.1 | 0.347 ± 0.012                                       | 0.358 ± 0.008                                          | 0.326 ± 0.002                                        |
| Bacteria No.2 | 0.335 ± 0.010                                       | 0.329 ± 0.018                                          | 0.332 ± 0.029                                        |
| Bacteria No.3 | 0.351 ± 0.003                                       | 0.349 ± 0.004                                          | 0.056 ± 0.006                                        |
| Bacteria No.4 | 0.326 ± 0.009                                       | 0.362 ± 0.009                                          | 0.349 ± 0.007                                        |
| Bacteria No.5 | 0.338 ± 0.013                                       | 0.337 ± 0.004                                          | 0.350 ± 0.007                                        |
| Bacteria No.6 | 0.356 ± 0.017                                       | 0.359 ± 0.004                                          | 0.394 ± 0.011                                        |
| Bacteria No.7 | 0.367 ± 0.019                                       | 0.368 ± 0.010                                          | 0.381 ± 0.042                                        |
| Bacteria No.8 | 0.389 ± 0.013                                       | 0.371 ± 0.004                                          | 0.394 ± 0.033                                        |
| Bacteria No.9 | 0.335 ± 0.009                                       | 0.334 ± 0.010                                          | 0.284 ± 0.004                                        |
| Control       | 0.369 ± 0.012                                       | -                                                      | -                                                    |

References

1. Yamaguchi, M.; Honjo, T. Effects of temperature, salinity and irradiance on the growth of the noxious red tide flagellate *Gymnodinium nagasakiense* (Dinophyceae). *Bull. Jpn. Soc. Sci. Fish. (Japan)* **1989**, *55*, 2029–2036.

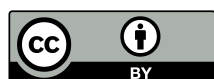

© 2018 by the authors. Submitted for possible open access publication under the terms and conditions of the Creative Commons Attribution (CC BY) license (<http://creativecommons.org/licenses/by/4.0/>).
